# Supplementary material for: Surface properties and rising velocities of pristine and weathered plastic pellets
Source: Royal Society of Chemistry journal article supplement (doi:10.1039/d1em00495f), 2022-01-01

**Supplementary material for:**

**Surface properties and rising velocities of pristine and weathered  
plastic production pellets**

Tom Bond<sup>1\*</sup>, Jack Morton<sup>1</sup>, Zeinab Al-Rekabi<sup>2</sup>, David Cant<sup>2</sup>, Stuart Davidson<sup>2</sup> and Yiwen  
Pei<sup>2</sup>

1. Department of Civil and Environmental Engineering, University of Surrey, University  
Campus, Guildford, GU2 7XH, UK

2. Surface Technology group, National Physical Laboratory, Hampton Road, Teddington,  
Middlesex, TW11 0LW, UK

\*Corresponding author, email: [t.bond@surrey.ac.uk](mailto:t.bond@surrey.ac.uk)

This supplementary material contains three tables (Tables SM-1 to SM-3) and two figures  
(Figures SM-1 and SM-2).

**Table SM-1: AFM comparative analysis of the root-mean-square roughness ( $S_q$ ) and the mean roughness ( $S_a$ ) for the pristine and the weathered samples.**

| Samples           | Root-mean-square roughness ( $S_q$ , nm) <sup>a</sup> | Mean roughness ( $S_a$ , nm) <sup>a</sup> |
|-------------------|-------------------------------------------------------|-------------------------------------------|
| Pristine pellets  | 73 ± 14                                               | 59 ± 11                                   |
| Weathered pellets | 94 ± 35                                               | 74 ± 26                                   |

<sup>a</sup>Uncertainty is based on the AFM measurements at seven different locations of the same sample.

**Table SM-2: XPS analysis of elemental composition of selected samples**

| Peak  | Pristine milled (salt free) | Pristine (with salt) | Pristine (salt free) | Weathered (with salt) |
|-------|-----------------------------|----------------------|----------------------|-----------------------|
| C 1s  | 97.7                        | 91.2                 | 98.6                 | 86.0                  |
| O 1s  | 1.3                         | 6.3                  | 1.1                  | 9.9                   |
| N 1s  | -                           | 0.2                  | -                    | 0.3                   |
| Si 2p | 1.0                         | 1.4                  | -                    | 2.4                   |
| Na 1s | -                           | 0.5                  | <0.1                 | 0.5                   |
| Ca 2p | -                           | 0.4                  | -                    | 0.9                   |
| P 2p  | -                           | -                    | 0.2                  | -                     |

**Table SM-3: Binding energies of pellet samples analysed by XPS**

| Peak      | Binding Energy (eV) |                 |                      |           |
|-----------|---------------------|-----------------|----------------------|-----------|
|           | Pristine milled     | Pristine (salt) | Pristine (Salt Free) | Weathered |
| C 1s      | 285.0*              | 285.0*          | 285.0*               | 285.0*    |
| O 1s      | 532.4               | 532.2           | 533.0                | 532.0     |
| N 1s      | -                   | 400.0           | -                    | 400.2     |
| Si 2p 3/2 | 102.2               | 102.2           | -                    | 102.4     |
| Ca 2p 3/2 | -                   | 347.6           | -                    | 347.2     |
| Na 1s     | -                   | 1071.4          | 1071.5               | 1071.7    |
| P 2p 3/2  | -                   | -               | 134.7                | -         |

\*\*All binding energies reported relative to hydrocarbon peak in C 1s spectrum, which is fixed at 285.0 eV

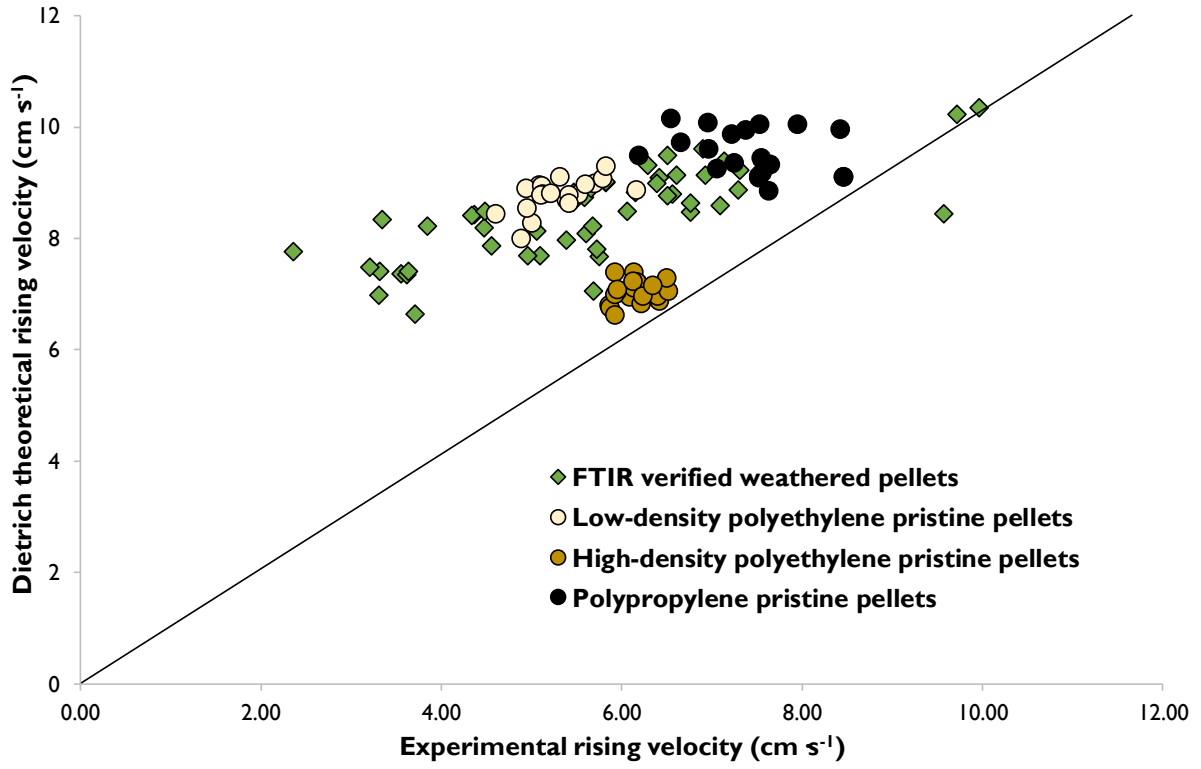

**Figure SM-1: Relationships between experimental and Dietrich theoretical rising velocities**

**Figure SM-2: AFM images of height, amplitude and phase (30  $\mu\text{m}$  x 30  $\mu\text{m}$ ) of the pristine pellet (top), pristine-milled sample (middle) and weathered pellet (bottom).**

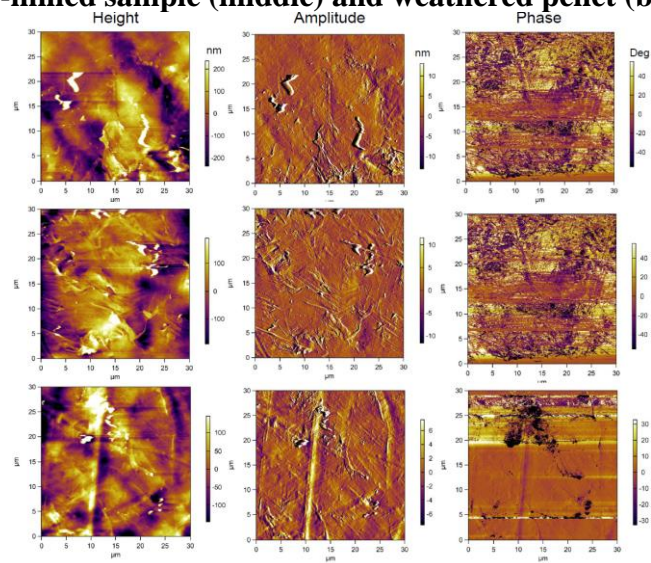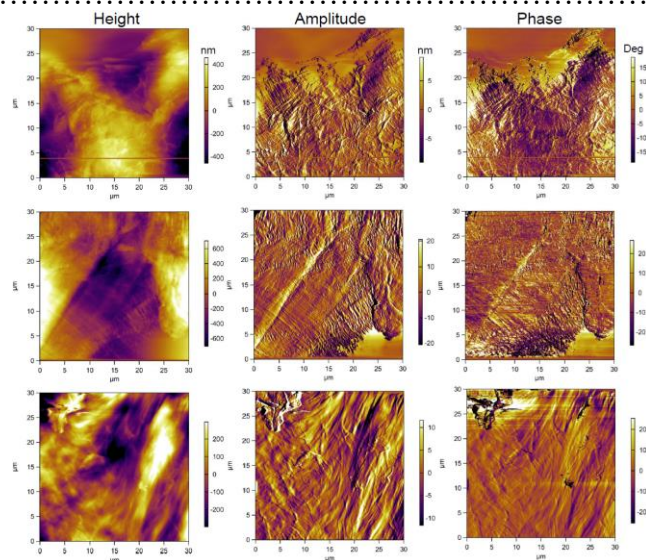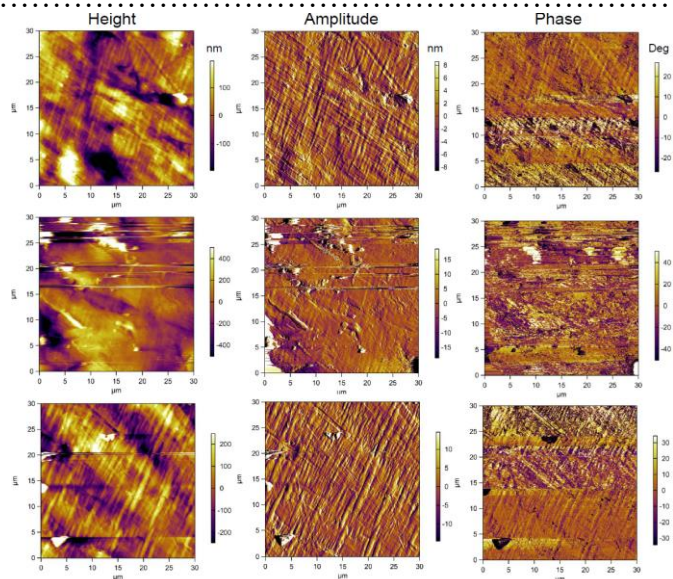

Supplement: d1em00495f1.pdf [file d1em00495f1.pdf]
